# Supplementary material for: Annurca Apple Oleolite as Functional Ingredient for the Formulation of Cosmetics with Skin-Antiaging Activity
Source: MDPI journal article supplement (doi:10.3390/ijms25031677), 2024-01-30
Supplement: s1 [file s1]

| Trans epidermal water loss (TEWL) D0 - 1h<br>2,5% w/w AAO formulation |             |       |            |            |
|-----------------------------------------------------------------------|-------------|-------|------------|------------|
| # Volontario                                                          | D0          | 1h    | Δ(1h - D0) | Δ(1h -D0)% |
| 1                                                                     | 8,200       | 9,700 | 1,50       | 18,3       |
| 2                                                                     | 8,500       | 9,240 | 0,74       | 8,7        |
| 3                                                                     | 9,000       | 6,700 | -2,30      | -25,6      |
| 4                                                                     | 8,200       | 8,200 | 0,00       | 0,0        |
| 5                                                                     | 8,700       | 7,700 | -1,00      | -11,5      |
| 6                                                                     | 9,500       | 8,140 | -1,36      | -14,3      |
| 7                                                                     | 9,300       | 6,060 | -3,24      | -34,8      |
| 8                                                                     | 9,700       | 8,200 | -1,50      | -15,5      |
| 9                                                                     | 8,400       | 7,800 | -0,60      | -7,1       |
| 10                                                                    | 9,400       | 7,470 | -1,93      | -20,5      |
| 11                                                                    | 8,300       | 6,600 | -1,70      | -20,5      |
| 12                                                                    | 9,300       | 9,160 | -0,14      | -1,5       |
| 13                                                                    | 9,100       | 7,800 | -1,30      | -14,3      |
| 14                                                                    | 8,800       | 7,700 | -1,10      | -12,5      |
| 15                                                                    | 9,500       | 8,840 | -0,66      | -6,9       |
| 16                                                                    | 9,300       | 6,200 | -3,10      | -33,3      |
| 17                                                                    | 9,900       | 9,100 | -0,80      | -8,1       |
| 18                                                                    | 8,900       | 7,820 | -1,08      | -12,1      |
| 19                                                                    | 9,200       | 5,500 | -3,70      | -40,2      |
| 20                                                                    | 8,700       | 7,600 | -1,10      | -12,6      |
| Media                                                                 | 9,0         | 7,8   | -1,2       | -13,2      |
| Std. Dev                                                              | 0,5         | 1,1   | 1,3        |            |
| N. Volontari                                                          | 20          | 20    | 20         |            |
| t-test                                                                | 4,386991471 |       |            |            |
| Gradi di Libertà                                                      | 38          |       |            |            |
| p                                                                     | 8,81664E-05 |       |            |            |

\*\*\*

| Trans epidermal water loss (TEWL) D0 - 1h<br>PLACEBO |             |        |            |            |
|------------------------------------------------------|-------------|--------|------------|------------|
| # Volontario                                         | D0          | 1h     | Δ(1h - D0) | Δ(1h -D0)% |
| 1                                                    | 8,700       | 7,300  | -1,40      | -16,1      |
| 2                                                    | 7,300       | 7,000  | -0,30      | -4,1       |
| 3                                                    | 4,200       | 6,800  | 2,60       | 61,9       |
| 4                                                    | 8,500       | 7,100  | -1,40      | -16,5      |
| 5                                                    | 9,000       | 9,100  | 0,10       | 1,1        |
| 6                                                    | 8,200       | 10,200 | 2,00       | 24,4       |
| 7                                                    | 8,700       | 9,000  | 0,30       | 3,4        |
| 8                                                    | 6,100       | 7,100  | 1,00       | 16,4       |
| 9                                                    | 8,900       | 7,300  | -1,60      | -18,0      |
| 10                                                   | 7,000       | 6,300  | -0,70      | -10,0      |
| 11                                                   | 9,900       | 8,800  | -1,10      | -11,1      |
| 12                                                   | 7,600       | 7,700  | 0,10       | 1,3        |
| 13                                                   | 7,600       | 8,100  | 0,50       | 6,6        |
| 14                                                   | 7,900       | 10,700 | 2,80       | 35,4       |
| 15                                                   | 5,900       | 6,400  | 0,50       | 8,5        |
| 16                                                   | 7,700       | 8,100  | 0,40       | 5,2        |
| 17                                                   | 9,800       | 8,400  | -1,40      | -14,3      |
| 18                                                   | 6,300       | 5,900  | -0,40      | -6,3       |
| 19                                                   | 8,000       | 7,900  | -0,10      | -1,3       |
| 20                                                   | 6,300       | 6,500  | 0,20       | 3,2        |
| Media                                                | 7,7         | 7,8    | 0,1        | 3,5        |
| Std. Dev                                             | 1,4         | 1,3    | 1,3        |            |
| N. Volontari                                         | 20          | 20     | 20         |            |
| t-test                                               | 0,245490124 |        |            |            |
| Gradi di Libertà                                     | 38          |        |            |            |
| p                                                    | 0,807397999 |        |            |            |

| Trans epidermal water loss (TEWL) D0 - 24h<br>2,5% w/w AAO formulation |             |       |             |             |
|------------------------------------------------------------------------|-------------|-------|-------------|-------------|
| # Volontario                                                           | D0          | 24h   | Δ(24h - D0) | Δ(24h -D0)% |
| 1                                                                      | 8,200       | 8,100 | -0,10       | -1,2        |
| 2                                                                      | 8,500       | 7,010 | -1,49       | -17,5       |
| 3                                                                      | 9,000       | 6,350 | -2,65       | -29,4       |
| 4                                                                      | 8,200       | 8,800 | 0,60        | 7,3         |
| 5                                                                      | 8,700       | 8,400 | -0,30       | -3,4        |
| 6                                                                      | 9,500       | 6,880 | -2,62       | -27,6       |
| 7                                                                      | 9,300       | 6,600 | -2,70       | -29,0       |
| 8                                                                      | 9,700       | 7,500 | -2,20       | -22,7       |
| 9                                                                      | 8,400       | 7,900 | -0,50       | -6,0        |
| 10                                                                     | 9,400       | 9,130 | -0,27       | -2,9        |
| 11                                                                     | 8,300       | 6,500 | -1,80       | -21,7       |
| 12                                                                     | 9,300       | 8,880 | -0,42       | -4,5        |
| 13                                                                     | 9,100       | 9,000 | -0,10       | -1,1        |
| 14                                                                     | 8,800       | 9,100 | 0,30        | 3,4         |
| 15                                                                     | 9,500       | 8,270 | -1,23       | -12,9       |
| 16                                                                     | 9,300       | 5,500 | -3,80       | -40,9       |
| 17                                                                     | 9,900       | 6,500 | -3,40       | -34,3       |
| 18                                                                     | 8,900       | 8,900 | 0,00        | 0,0         |
| 19                                                                     | 9,200       | 6,900 | -2,30       | -25,0       |
| 20                                                                     | 8,700       | 8,800 | 0,10        | 1,1         |
| Media                                                                  | 9,0         | 7,8   | -1,2        | -13,4       |
| Std. Dev                                                               | 0,5         | 1,1   | 1,3         |             |
| N. Volontari                                                           | 20          | 20    | 20          |             |
| t-test                                                                 | 4,473848333 |       |             |             |
| Gradi di Libertà                                                       | 38          |       |             |             |
| p                                                                      | 6,7635E-05  |       |             |             |

\*\*\*

| Trans epidermal water loss (TEWL) D0 - 24h<br>PLACEBO |             |        |             |             |
|-------------------------------------------------------|-------------|--------|-------------|-------------|
| # Volontario                                          | D0          | 24h    | Δ(24h - D0) | Δ(24h -D0)% |
| 1                                                     | 8,700       | 7,600  | -1,10       | -12,6       |
| 2                                                     | 7,300       | 7,700  | 0,40        | 5,5         |
| 3                                                     | 4,200       | 6,800  | 2,60        | 61,9        |
| 4                                                     | 8,500       | 7,200  | -1,30       | -15,3       |
| 5                                                     | 9,000       | 13,090 | 4,09        | 45,4        |
| 6                                                     | 8,200       | 11,500 | 3,30        | 40,2        |
| 7                                                     | 8,700       | 8,500  | -0,20       | -2,3        |
| 8                                                     | 6,100       | 6,700  | 0,60        | 9,8         |
| 9                                                     | 8,900       | 11,200 | 2,30        | 25,8        |
| 10                                                    | 7,000       | 6,400  | -0,60       | -8,6        |
| 11                                                    | 9,900       | 7,600  | -2,30       | -23,2       |
| 12                                                    | 7,600       | 5,200  | -2,40       | -31,6       |
| 13                                                    | 7,600       | 6,000  | -1,60       | -21,1       |
| 14                                                    | 7,900       | 12,600 | 4,70        | 59,5        |
| 15                                                    | 5,900       | 7,900  | 2,00        | 33,9        |
| 16                                                    | 7,700       | 7,000  | -0,70       | -9,1        |
| 17                                                    | 9,800       | 7,400  | -2,40       | -24,5       |
| 18                                                    | 6,300       | 5,800  | -0,50       | -7,9        |
| 19                                                    | 8,000       | 6,400  | -1,60       | -20,0       |
| 20                                                    | 6,300       | 4,800  | -1,50       | -23,8       |
| Media                                                 | 7,7         | 7,9    | 0,2         | 4,1         |
| Std. Dev                                              | 1,4         | 2,4    | 2,2         |             |
| N. Volontari                                          | 20          | 20     | 20          |             |
| t-test                                                | 0,306678287 |        |             |             |
| Gradi di Libertà                                      | 38          |        |             |             |
| p                                                     | 0,760762476 |        |             |             |

| Trans epidermal water loss (TEWL) D0 - D14<br>2,5% w/w AAO formulation |             |      |              |              |
|------------------------------------------------------------------------|-------------|------|--------------|--------------|
| # Volontario                                                           | D0          | D14  | Δ(TD14 - D0) | Δ(D14 -D0)%  |
| 1                                                                      | 8,20        | 7,95 | -0,25        | -3,0         |
| 2                                                                      | 8,50        | 6,92 | -1,58        | -18,5        |
| 3                                                                      | 9,00        | 6,10 | -2,90        | -32,2        |
| 4                                                                      | 8,20        | 7,40 | -0,80        | -9,8         |
| 5                                                                      | 8,70        | 7,25 | -1,45        | -16,7        |
| 6                                                                      | 9,50        | 8,04 | -1,46        | -15,4        |
| 7                                                                      | 9,30        | 6,06 | -3,24        | -34,8        |
| 8                                                                      | 9,70        | 8,11 | -1,59        | -16,4        |
| 9                                                                      | 8,40        | 7,03 | -1,37        | -16,3        |
| 10                                                                     | 9,40        | 7,17 | -2,23        | -23,7        |
| 11                                                                     | 8,30        | 7,60 | -0,70        | -8,4         |
| 12                                                                     | 9,30        | 8,96 | -0,34        | -3,7         |
| 13                                                                     | 9,10        | 7,94 | -1,16        | -12,7        |
| 14                                                                     | 8,80        | 7,40 | -1,40        | -15,9        |
| 15                                                                     | 9,50        | 8,97 | -0,53        | -5,6         |
| 16                                                                     | 9,30        | 7,12 | -2,18        | -23,4        |
| 17                                                                     | 9,90        | 8,10 | -1,80        | -18,2        |
| 18                                                                     | 8,90        | 7,12 | -1,78        | -20,0        |
| 19                                                                     | 9,20        | 6,75 | -2,45        | -26,6        |
| 20                                                                     | 8,70        | 7,17 | -1,53        | -17,6        |
| <b>Media</b>                                                           | 9,0         | 7,5  | -1,5         | <b>-17,0</b> |
| <b>Std. Dev</b>                                                        | 0,5         | 0,8  | 0,8          |              |
| N. Volontari                                                           | 20          | 20   | 20           |              |
| <b>t-test</b>                                                          | 7,416844756 |      |              |              |
| Gradi di Libertà                                                       | 38          |      |              |              |
| <b>p</b>                                                               | 6,75899E-09 |      |              |              |
|                                                                        | ***         |      |              |              |

| Trans epidermal water loss (TEWL) D0 - D14<br>PLACEBO |             |      |              |             |
|-------------------------------------------------------|-------------|------|--------------|-------------|
| # Volontario                                          | D0          | D14  | Δ(TD14 - D0) | Δ(D14 -D0)% |
| 1                                                     | 8,70        | 7,25 | -1,45        | -16,7       |
| 2                                                     | 7,30        | 7,14 | -0,16        | -2,2        |
| 3                                                     | 4,20        | 6,88 | 2,68         | 63,8        |
| 4                                                     | 8,50        | 7,17 | -1,33        | -15,6       |
| 5                                                     | 9,00        | 9,15 | 0,15         | 1,7         |
| 6                                                     | 8,20        | 9,72 | 1,52         | 18,5        |
| 7                                                     | 8,70        | 9,61 | 0,91         | 10,5        |
| 8                                                     | 6,10        | 7,34 | 1,24         | 20,3        |
| 9                                                     | 8,90        | 7,42 | -1,48        | -16,6       |
| 10                                                    | 7,00        | 6,60 | -0,40        | -5,7        |
| 11                                                    | 9,90        | 8,45 | -1,45        | -14,6       |
| 12                                                    | 7,60        | 7,83 | 0,23         | 3,0         |
| 13                                                    | 7,60        | 8,31 | 0,71         | 9,3         |
| 14                                                    | 7,90        | 9,17 | 1,27         | 16,1        |
| 15                                                    | 5,90        | 6,90 | 1,00         | 16,9        |
| 16                                                    | 7,70        | 8,71 | 1,01         | 13,1        |
| 17                                                    | 9,80        | 8,64 | -1,16        | -11,8       |
| 18                                                    | 6,30        | 6,25 | -0,05        | -0,8        |
| 19                                                    | 8,00        | 8,25 | 0,25         | 3,1         |
| 20                                                    | 6,30        | 6,74 | 0,44         | 7,0         |
| <b>Media</b>                                          | 7,7         | 7,9  | 0,2          | <b>5,0</b>  |
| <b>Std. Dev</b>                                       | 1,4         | 1,1  | 1,2          |             |
| N. Volontari                                          | 20          | 20   | 20           |             |
| <b>t-test</b>                                         | 0,498222884 |      |              |             |
| Gradi di Libertà                                      | 38          |      |              |             |
| <b>p</b>                                              | 0,621198431 |      |              |             |

| Trans epidermal water loss (TEWL) D0 - D28<br>2,5% w/w AAO formulation |             |      |             |              |
|------------------------------------------------------------------------|-------------|------|-------------|--------------|
| # Volontario                                                           | D0          | D28  | Δ(T28 - D0) | Δ(D28 -D0)%  |
| 1                                                                      | 8,20        | 7,01 | -1,19       | -14,5        |
| 2                                                                      | 8,50        | 6,01 | -2,49       | -29,3        |
| 3                                                                      | 9,00        | 5,95 | -3,05       | -33,9        |
| 4                                                                      | 8,20        | 7,15 | -1,05       | -12,8        |
| 5                                                                      | 8,70        | 7,04 | -1,66       | -19,1        |
| 6                                                                      | 9,50        | 6,61 | -2,89       | -30,4        |
| 7                                                                      | 9,30        | 5,92 | -3,38       | -36,3        |
| 8                                                                      | 9,70        | 7,13 | -2,57       | -26,5        |
| 9                                                                      | 8,40        | 7,00 | -1,40       | -16,7        |
| 10                                                                     | 9,40        | 6,95 | -2,45       | -26,1        |
| 11                                                                     | 8,30        | 6,12 | -2,18       | -26,3        |
| 12                                                                     | 9,30        | 8,58 | -0,72       | -7,7         |
| 13                                                                     | 9,10        | 7,49 | -1,61       | -17,7        |
| 14                                                                     | 8,80        | 7,10 | -1,70       | -19,3        |
| 15                                                                     | 9,50        | 8,28 | -1,22       | -12,8        |
| 16                                                                     | 9,30        | 6,54 | -2,76       | -29,7        |
| 17                                                                     | 9,90        | 7,50 | -2,40       | -24,2        |
| 18                                                                     | 8,90        | 6,91 | -1,99       | -22,4        |
| 19                                                                     | 9,20        | 6,29 | -2,91       | -31,6        |
| 20                                                                     | 8,70        | 6,80 | -1,90       | -21,8        |
| <b>Media</b>                                                           | 9,0         | 6,9  | -2,1        | <b>-23,0</b> |
| <b>Std. Dev</b>                                                        | 0,5         | 0,7  | 0,7         |              |
| N. Volontari                                                           | 20          | 20   | 20          |              |
| <b>t-test</b>                                                          | 10,67330468 |      |             |              |
| Gradi di Libertà                                                       | 38          |      |             |              |
| <b>p</b>                                                               | 5,41229E-13 |      |             |              |
|                                                                        | ***         |      |             |              |

| Trans epidermal water loss (TEWL) D0 - D28<br>PLACEBO |             |      |             |             |
|-------------------------------------------------------|-------------|------|-------------|-------------|
| # Volontario                                          | D0          | D28  | Δ(D28 - D0) | Δ(D28 -D0)% |
| 1                                                     | 8,70        | 8,60 | -0,10       | -1,1        |
| 2                                                     | 7,30        | 7,47 | 0,17        | 2,3         |
| 3                                                     | 4,20        | 5,96 | 1,76        | 41,9        |
| 4                                                     | 8,50        | 7,64 | -0,86       | -10,1       |
| 5                                                     | 9,00        | 10,2 | 1,20        | 13,3        |
| 6                                                     | 8,20        | 10,0 | 1,75        | 21,3        |
| 7                                                     | 8,70        | 10,6 | 1,93        | 22,2        |
| 8                                                     | 6,10        | 7,70 | 1,60        | 26,2        |
| 9                                                     | 8,90        | 9,52 | 0,62        | 7,0         |
| 10                                                    | 7,00        | 7,40 | 0,40        | 5,7         |
| 11                                                    | 9,90        | 9,06 | -0,84       | -8,5        |
| 12                                                    | 7,60        | 8,20 | 0,60        | 7,9         |
| 13                                                    | 7,60        | 7,56 | -0,04       | -0,5        |
| 14                                                    | 7,90        | 9,67 | 1,77        | 22,4        |
| 15                                                    | 5,90        | 7,19 | 1,29        | 21,9        |
| 16                                                    | 7,70        | 7,25 | -0,45       | -5,8        |
| 17                                                    | 9,80        | 8,40 | -1,40       | -14,3       |
| 18                                                    | 6,30        | 5,98 | -0,32       | -5,1        |
| 19                                                    | 8,00        | 8,40 | 0,40        | 5,0         |
| 20                                                    | 6,30        | 6,83 | 0,53        | 8,4         |
| <b>Media</b>                                          | 7,7         | 8,2  | 0,5         | <b>8,0</b>  |
| <b>Std. Dev</b>                                       | 1,4         | 1,3  | 1,0         |             |
| N. Volontari                                          | 20          | 20   | 20          |             |
| <b>t-test</b>                                         | 1,151690056 |      |             |             |
| Gradi di Libertà                                      | 38          |      |             |             |
| <b>p</b>                                              | 0,256643193 |      |             |             |

| Skin conductance (Corneometry) D0 - 1h<br>2,5% w/w AAO formulation |             |        |            |             |
|--------------------------------------------------------------------|-------------|--------|------------|-------------|
| # Volontario                                                       | D0          | 1h     | Δ(1h - D0) | Δ(1h - D0)% |
| 1                                                                  | 28,600      | 32,900 | 4,30       | 15,0        |
| 2                                                                  | 29,100      | 39,300 | 10,20      | 35,1        |
| 3                                                                  | 28,590      | 31,780 | 3,19       | 11,2        |
| 4                                                                  | 29,960      | 43,300 | 13,34      | 44,5        |
| 5                                                                  | 29,400      | 32,930 | 3,53       | 12,0        |
| 6                                                                  | 29,900      | 27,430 | -2,47      | -8,3        |
| 7                                                                  | 28,800      | 27,980 | -0,82      | -2,8        |
| 8                                                                  | 28,900      | 35,120 | 6,22       | 21,5        |
| 9                                                                  | 27,640      | 39,610 | 11,97      | 43,3        |
| 10                                                                 | 27,900      | 32,260 | 4,36       | 15,6        |
| 11                                                                 | 29,020      | 28,930 | -0,09      | -0,3        |
| 12                                                                 | 29,310      | 33,090 | 3,78       | 12,9        |
| 13                                                                 | 28,570      | 50,970 | 22,40      | 78,4        |
| 14                                                                 | 28,810      | 33,190 | 4,38       | 15,2        |
| 15                                                                 | 34,000      | 37,120 | 3,12       | 9,2         |
| 16                                                                 | 28,200      | 31,940 | 3,74       | 13,3        |
| 17                                                                 | 30,500      | 39,820 | 9,32       | 30,6        |
| 18                                                                 | 29,050      | 31,120 | 2,07       | 7,1         |
| 19                                                                 | 33,820      | 39,920 | 6,10       | 18,0        |
| 20                                                                 | 32,800      | 27,560 | -5,24      | -16,0       |
| Media                                                              | 29,6        | 34,8   | 5,2        | 17,8        |
| Std. Dev                                                           | 1,8         | 5,9    | 6,1        |             |
| N. Volontari                                                       | 20          | 20     | 20         |             |
| t-test                                                             | 3,718503531 |        |            |             |
| Gradi di Libertà                                                   | 38          |        |            |             |
| p                                                                  | 0,000644645 |        |            |             |
|                                                                    | ***         |        |            |             |

| Skin conductance (Corneometry) D0 - 1h<br>PLACEBO |             |        |            |             |
|---------------------------------------------------|-------------|--------|------------|-------------|
| # Volontario                                      | D0          | 1h     | Δ(1h - D0) | Δ(1h - D0)% |
| 1                                                 | 30,560      | 36,000 | 5,44       | 17,8        |
| 2                                                 | 50,140      | 44,460 | -5,68      | -11,3       |
| 3                                                 | 23,220      | 28,300 | 5,08       | 21,9        |
| 4                                                 | 34,520      | 33,840 | -0,68      | -2,0        |
| 5                                                 | 27,060      | 23,560 | -3,50      | -12,9       |
| 6                                                 | 30,560      | 23,040 | -7,52      | -24,6       |
| 7                                                 | 17,340      | 17,360 | 0,02       | 0,1         |
| 8                                                 | 26,240      | 25,280 | -0,96      | -3,7        |
| 9                                                 | 34,980      | 42,160 | 7,18       | 20,5        |
| 10                                                | 35,760      | 45,600 | 9,84       | 27,5        |
| 11                                                | 32,400      | 31,340 | -1,06      | -3,3        |
| 12                                                | 35,100      | 38,720 | 3,62       | 10,3        |
| 13                                                | 55,920      | 56,300 | 0,38       | 0,7         |
| 14                                                | 33,160      | 42,880 | 9,72       | 29,3        |
| 15                                                | 34,120      | 35,580 | 1,46       | 4,3         |
| 16                                                | 13,740      | 14,340 | 0,60       | 4,4         |
| 17                                                | 41,560      | 34,140 | -7,42      | -17,9       |
| 18                                                | 31,140      | 31,680 | 0,54       | 1,7         |
| 19                                                | 25,220      | 27,100 | 1,88       | 7,5         |
| 20                                                | 27,160      | 34,200 | 7,04       | 25,9        |
| Media                                             | 32,0        | 33,3   | 1,3        | 4,8         |
| Std. Dev                                          | 9,7         | 10,2   | 5,1        |             |
| N. Volontari                                      | 20          | 20     | 20         |             |
| t-test                                            | 0,412871208 |        |            |             |
| Gradi di Libertà                                  | 38          |        |            |             |
| p                                                 | 0,68202139  |        |            |             |

| Skin conductance (Corneometry) D0 - 24h<br>2,5% w/w AAO formulation |             |        |             |              |
|---------------------------------------------------------------------|-------------|--------|-------------|--------------|
| # Volontario                                                        | D0          | 24h    | Δ(24h - D0) | Δ(24h - D0)% |
| 1                                                                   | 28,600      | 36,520 | 7,92        | 27,7         |
| 2                                                                   | 29,100      | 41,580 | 12,48       | 42,9         |
| 3                                                                   | 28,590      | 30,670 | 2,08        | 7,3          |
| 4                                                                   | 29,960      | 39,100 | 9,14        | 30,5         |
| 5                                                                   | 29,400      | 31,680 | 2,28        | 7,8          |
| 6                                                                   | 29,900      | 33,700 | 3,80        | 12,7         |
| 7                                                                   | 28,800      | 32,340 | 3,54        | 12,3         |
| 8                                                                   | 28,900      | 30,700 | 1,80        | 6,2          |
| 9                                                                   | 27,640      | 30,640 | 3,00        | 10,9         |
| 10                                                                  | 27,900      | 37,560 | 9,66        | 34,6         |
| 11                                                                  | 29,020      | 32,390 | 3,37        | 11,6         |
| 12                                                                  | 29,310      | 30,540 | 1,23        | 4,2          |
| 13                                                                  | 28,570      | 42,380 | 13,81       | 48,3         |
| 14                                                                  | 28,810      | 32,850 | 4,04        | 14,0         |
| 15                                                                  | 34,000      | 36,480 | 2,48        | 7,3          |
| 16                                                                  | 28,200      | 31,720 | 3,52        | 12,5         |
| 17                                                                  | 30,500      | 39,760 | 9,26        | 30,4         |
| 18                                                                  | 29,050      | 34,830 | 5,78        | 19,9         |
| 19                                                                  | 33,820      | 33,720 | -0,10       | -0,3         |
| 20                                                                  | 32,800      | 33,710 | 0,91        | 2,8          |
| Media                                                               | 29,6        | 34,6   | 5,0         | 17,2         |
| Std. Dev                                                            | 1,8         | 3,8    | 4,0         |              |
| N. Volontari                                                        | 20          | 20     | 20          |              |
| t-test                                                              | 5,364350292 |        |             |              |
| Gradi di Libertà                                                    | 38          |        |             |              |
| p                                                                   | 4,23347E-06 |        |             |              |
|                                                                     | ***         |        |             |              |

| Skin conductance (Corneometry) D0 - 24h<br>PLACEBO |          |        |             |              |
|----------------------------------------------------|----------|--------|-------------|--------------|
| # Volontario                                       | D0       | 24h    | Δ(24h - D0) | Δ(24h - D0)% |
| 1                                                  | 30,560   | 31,160 | 0,60        | 2,0          |
| 2                                                  | 50,140   | 44,000 | -6,14       | -12,2        |
| 3                                                  | 23,220   | 25,600 | 2,38        | 10,2         |
| 4                                                  | 34,520   | 26,020 | -8,50       | -24,6        |
| 5                                                  | 27,060   | 29,480 | 2,42        | 8,9          |
| 6                                                  | 30,560   | 25,400 | -5,16       | -16,9        |
| 7                                                  | 17,340   | 22,640 | 5,30        | 30,6         |
| 8                                                  | 26,240   | 30,360 | 4,12        | 15,7         |
| 9                                                  | 34,980   | 35,560 | 0,58        | 1,7          |
| 10                                                 | 35,760   | 40,760 | 5,00        | 14,0         |
| 11                                                 | 32,400   | 34,400 | 2,00        | 6,2          |
| 12                                                 | 35,100   | 37,000 | 1,90        | 5,4          |
| 13                                                 | 55,920   | 53,620 | -2,30       | -4,1         |
| 14                                                 | 33,160   | 42,860 | 9,70        | 29,3         |
| 15                                                 | 34,120   | 29,340 | -4,78       | -14,0        |
| 16                                                 | 13,740   | 14,800 | 1,06        | 7,7          |
| 17                                                 | 41,560   | 44,700 | 3,14        | 7,6          |
| 18                                                 | 31,140   | 28,460 | -2,68       | -8,6         |
| 19                                                 | 25,220   | 24,940 | -0,28       | -1,1         |
| 20                                                 | 27,160   | 18,800 | -8,36       | -30,8        |
| Media                                              | 32,0     | 32,0   | 0,0         | 1,3          |
| Std. Dev                                           | 9,7      | 9,6    | 4,8         |              |
| N. Volontari                                       | 20       | 20     | 20          |              |
| t-test                                             | 0        |        |             |              |
| Gradi di Libertà                                   | 38       |        |             |              |
| p                                                  | 1,000000 |        |             |              |

| Skin conductance (Corneometry) D0 - D14<br>2,5% w/w AAO formulation |             |       |             |              |
|---------------------------------------------------------------------|-------------|-------|-------------|--------------|
| # Volontario                                                        | D0          | D14   | Δ(D14 - D0) | Δ(D14 - D0)% |
| 1                                                                   | 28,60       | 31,50 | 2,90        | 10,1         |
| 2                                                                   | 29,10       | 36,23 | 7,13        | 24,5         |
| 3                                                                   | 28,59       | 32,83 | 4,24        | 14,8         |
| 4                                                                   | 29,96       | 43,17 | 13,21       | 44,1         |
| 5                                                                   | 29,40       | 34,29 | 4,89        | 16,6         |
| 6                                                                   | 29,90       | 30,53 | 0,63        | 2,1          |
| 7                                                                   | 28,80       | 29,90 | 1,10        | 3,8          |
| 8                                                                   | 28,90       | 36,21 | 7,31        | 25,3         |
| 9                                                                   | 27,64       | 38,46 | 10,82       | 39,1         |
| 10                                                                  | 27,90       | 35,13 | 7,23        | 25,9         |
| 11                                                                  | 29,02       | 31,19 | 2,17        | 7,5          |
| 12                                                                  | 29,31       | 32,95 | 3,64        | 12,4         |
| 13                                                                  | 28,57       | 37,90 | 9,33        | 32,6         |
| 14                                                                  | 28,81       | 35,62 | 6,81        | 23,6         |
| 15                                                                  | 34,00       | 39,12 | 5,12        | 15,1         |
| 16                                                                  | 28,20       | 33,59 | 5,39        | 19,1         |
| 17                                                                  | 30,50       | 41,38 | 10,88       | 35,7         |
| 18                                                                  | 29,05       | 33,56 | 4,51        | 15,5         |
| 19                                                                  | 33,82       | 40,58 | 6,76        | 20,0         |
| 20                                                                  | 32,80       | 36,86 | 4,06        | 12,4         |
| Media                                                               | 29,6        | 35,6  | 5,9         | 20,0         |
| Std. Dev                                                            | 1,8         | 3,7   | 3,3         |              |
| N. Volontari                                                        | 20          | 20    | 20          |              |
| t-test                                                              | 6,378166549 |       |             |              |
| Gradi di Libertà                                                    | 38          |       |             |              |
| p                                                                   | 1,72646E-07 |       |             |              |
|                                                                     | ***         |       |             |              |

| Skin conductance (Corneometry) D0 - D14<br>PLACEBO |             |       |             |              |
|----------------------------------------------------|-------------|-------|-------------|--------------|
| # Volontario                                       | D0          | D14   | Δ(D14 - D0) | Δ(D14 - D0)% |
| 1                                                  | 30,56       | 32,00 | 1,44        | 4,7          |
| 2                                                  | 31,14       | 34,16 | 3,02        | 9,7          |
| 3                                                  | 23,22       | 25,43 | 2,21        | 9,5          |
| 4                                                  | 34,52       | 33,24 | -1,28       | -3,7         |
| 5                                                  | 27,06       | 26,28 | -0,78       | -2,9         |
| 6                                                  | 30,56       | 32,40 | 1,84        | 6,0          |
| 7                                                  | 27,34       | 29,03 | 1,69        | 6,2          |
| 8                                                  | 26,24       | 25,48 | -0,76       | -2,9         |
| 9                                                  | 34,98       | 32,61 | -2,37       | -6,8         |
| 10                                                 | 35,76       | 35,32 | -0,44       | -1,2         |
| 11                                                 | 32,40       | 33,13 | 0,73        | 2,3          |
| 12                                                 | 35,10       | 36,22 | 1,12        | 3,2          |
| 13                                                 | 30,92       | 31,59 | 0,67        | 2,2          |
| 14                                                 | 33,16       | 34,26 | 1,10        | 3,3          |
| 15                                                 | 34,12       | 35,81 | 1,69        | 5,0          |
| 16                                                 | 27,74       | 32,50 | 4,76        | 17,2         |
| 17                                                 | 31,56       | 32,00 | 0,44        | 1,4          |
| 18                                                 | 31,14       | 33,88 | 2,74        | 8,8          |
| 19                                                 | 25,22       | 28,71 | 3,49        | 13,8         |
| 20                                                 | 27,16       | 23,62 | -3,54       | -13,0        |
| Media                                              | 30,5        | 31,4  | 0,9         | 3,1          |
| Std. Dev                                           | 3,6         | 3,7   | 2,0         |              |
| N. Volontari                                       | 20          | 20    | 20          |              |
| t-test                                             | 0,765852679 |       |             |              |
| Gradi di Libertà                                   | 38          |       |             |              |
| p                                                  | 0,448495182 |       |             |              |

| Skin conductance (Corneometry) D0 - D28<br>2,5% w/w AAO formulation |             |       |             |              |
|---------------------------------------------------------------------|-------------|-------|-------------|--------------|
| # Volontario                                                        | D0          | D28   | Δ(D28 - D0) | Δ(D28 - D0)% |
| 1                                                                   | 28,60       | 35,72 | 7,12        | 24,9         |
| 2                                                                   | 29,10       | 40,54 | 11,44       | 39,3         |
| 3                                                                   | 28,59       | 34,67 | 6,08        | 21,3         |
| 4                                                                   | 29,96       | 40,91 | 10,95       | 36,5         |
| 5                                                                   | 29,40       | 36,56 | 7,16        | 24,4         |
| 6                                                                   | 29,90       | 35,17 | 5,27        | 17,6         |
| 7                                                                   | 28,80       | 34,53 | 5,73        | 19,9         |
| 8                                                                   | 28,90       | 35,97 | 7,07        | 24,5         |
| 9                                                                   | 27,64       | 39,42 | 11,78       | 42,6         |
| 10                                                                  | 27,90       | 37,14 | 9,24        | 33,1         |
| 11                                                                  | 29,02       | 34,09 | 5,07        | 17,5         |
| 12                                                                  | 29,31       | 33,14 | 3,83        | 13,1         |
| 13                                                                  | 28,57       | 41,32 | 12,75       | 44,6         |
| 14                                                                  | 28,81       | 36,28 | 7,47        | 25,9         |
| 15                                                                  | 34,00       | 40,34 | 6,34        | 18,6         |
| 16                                                                  | 28,20       | 30,89 | 2,69        | 9,5          |
| 17                                                                  | 30,50       | 39,26 | 8,76        | 28,7         |
| 18                                                                  | 29,05       | 35,98 | 6,93        | 23,9         |
| 19                                                                  | 33,82       | 43,17 | 9,35        | 27,6         |
| 20                                                                  | 32,80       | 35,10 | 2,30        | 7,0          |
| Media                                                               | 29,6        | 37,0  | 7,4         | 25,0         |
| Std. Dev                                                            | 1,8         | 3,2   | 2,9         |              |
| N. Volontari                                                        | 20          | 20    | 20          |              |
| t-test                                                              | 9,023535827 |       |             |              |
| Gradi di Libertà                                                    | 38          |       |             |              |
| p                                                                   | 5,47722E-11 |       |             |              |
|                                                                     | ***         |       |             |              |

| Skin conductance (Corneometry) D0 - D28<br>PLACEBO |             |       |             |              |
|----------------------------------------------------|-------------|-------|-------------|--------------|
| # Volontario                                       | D0          | D28   | Δ(D28 - D0) | Δ(D28 - D0)% |
| 1                                                  | 30,56       | 34,18 | 3,62        | 11,8         |
| 2                                                  | 31,14       | 30,41 | -0,73       | -2,3         |
| 3                                                  | 23,22       | 26,36 | 3,14        | 13,5         |
| 4                                                  | 34,52       | 34,02 | -0,50       | -1,4         |
| 5                                                  | 27,06       | 28,14 | 1,08        | 4,0          |
| 6                                                  | 30,56       | 31,58 | 1,02        | 3,3          |
| 7                                                  | 27,34       | 30,67 | 3,33        | 12,2         |
| 8                                                  | 26,24       | 23,53 | -2,71       | -10,3        |
| 9                                                  | 34,98       | 31,95 | -3,03       | -8,7         |
| 10                                                 | 35,76       | 36,27 | 0,51        | 1,4          |
| 11                                                 | 32,40       | 34,84 | 2,44        | 7,5          |
| 12                                                 | 35,10       | 37,32 | 2,22        | 6,3          |
| 13                                                 | 30,92       | 33,58 | 2,66        | 8,6          |
| 14                                                 | 33,16       | 36,96 | 3,80        | 11,5         |
| 15                                                 | 34,12       | 37,83 | 3,71        | 10,9         |
| 16                                                 | 27,74       | 30,73 | 2,99        | 10,8         |
| 17                                                 | 31,56       | 30,57 | -0,99       | -3,1         |
| 18                                                 | 31,14       | 35,94 | 4,80        | 15,4         |
| 19                                                 | 25,22       | 29,19 | 3,97        | 15,8         |
| 20                                                 | 27,16       | 21,58 | -5,58       | -20,5        |
| Media                                              | 30,5        | 31,8  | 1,3         | 4,3          |
| Std. Dev                                           | 3,6         | 4,5   | 2,8         |              |
| N. Volontari                                       | 20          | 20    | 20          |              |
| t-test                                             | 0,997968214 |       |             |              |
| Gradi di Libertà                                   | 38          |       |             |              |
| p                                                  | 0,324607538 |       |             |              |

1,4

| Forehead wrinkles Score D0 - D14<br>2,5% w/w AAO formulation |             |        |             |              |
|--------------------------------------------------------------|-------------|--------|-------------|--------------|
| # Volontario                                                 | D0          | D14    | Δ(D14 - D0) | Δ(D14 - D0)% |
| 1                                                            | 27,228      | 23,789 | -3,44       | -12,6        |
| 2                                                            | 29,144      | 25,502 | -3,64       | -12,5        |
| 3                                                            | 25,483      | 27,996 | 2,51        | 9,9          |
| 4                                                            | 28,381      | 24,740 | -3,64       | -12,8        |
| 5                                                            | 29,339      | 24,268 | -5,07       | -17,3        |
| 6                                                            | 28,333      | 26,344 | -1,99       | -7,0         |
| 7                                                            | 25,883      | 26,504 | 0,62        | 2,4          |
| 8                                                            | 26,869      | 26,524 | -0,34       | -1,3         |
| 9                                                            | 24,541      | 23,241 | -1,30       | -5,3         |
| 10                                                           | 24,278      | 23,373 | -0,90       | -3,7         |
| 11                                                           | 23,535      | 24,210 | 0,68        | 2,9          |
| 12                                                           | 28,549      | 25,648 | -2,90       | -10,2        |
| 13                                                           | 25,725      | 24,787 | -0,94       | -3,6         |
| 14                                                           | 27,962      | 27,603 | -0,36       | -1,3         |
| 15                                                           | 25,727      | 23,465 | -2,26       | -8,8         |
| 16                                                           | 26,912      | 25,617 | -1,29       | -4,8         |
| 17                                                           | 28,565      | 25,954 | -2,61       | -9,1         |
| 18                                                           | 25,994      | 23,631 | -2,36       | -9,1         |
| 19                                                           | 24,345      | 22,156 | -2,19       | -9,0         |
| 20                                                           | 27,643      | 25,178 | -2,47       | -8,9         |
| Media                                                        | 26,7        | 25,0   | -1,7        | -6,1         |
| Std. Dev                                                     | 1,8         | 1,5    | 1,8         |              |
| N. Volontari                                                 | 20          | 20     | 20          |              |
| t-test                                                       | 3,245056881 |        |             |              |
| Gradi di Libertà                                             | 38          |        |             |              |
| p                                                            | 0,002452147 |        |             |              |
| **                                                           |             |        |             |              |

|  |  |  |  |  |
|--|--|--|--|--|
|  |  |  |  |  |
|  |  |  |  |  |
|  |  |  |  |  |
|  |  |  |  |  |
|  |  |  |  |  |

| Forehead wrinkles Score D0 - D14<br>PLACEBO |             |        |             |              |
|---------------------------------------------|-------------|--------|-------------|--------------|
| # Volontario                                | D0          | D14    | Δ(D14 - D0) | Δ(D14 - D0)% |
| 1                                           | 26,300      | 28,442 | 2,14        | 8,1          |
| 2                                           | 27,611      | 25,502 | -2,11       | -7,6         |
| 3                                           | 35,359      | 40,345 | 4,99        | 14,1         |
| 4                                           | 37,454      | 40,488 | 3,03        | 8,1          |
| 5                                           | 29,340      | 30,481 | 1,14        | 3,9          |
| 6                                           | 26,747      | 28,344 | 1,60        | 6,0          |
| 7                                           | 34,977      | 35,804 | 0,83        | 2,4          |
| 8                                           | 36,223      | 35,786 | -0,44       | -1,2         |
| 9                                           | 31,120      | 41,153 | 10,03       | 32,2         |
| 10                                          | 28,807      | 29,738 | 0,93        | 3,2          |
| 11                                          | 30,992      | 34,473 | 3,48        | 11,2         |
| 12                                          | 30,577      | 33,196 | 2,62        | 8,6          |
| 13                                          | 27,614      | 25,198 | -2,42       | -8,7         |
| 14                                          | 34,826      | 35,404 | 0,58        | 1,7          |
| 15                                          | 28,157      | 30,984 | 2,83        | 10,0         |
| 16                                          | 32,494      | 35,166 | 2,67        | 8,2          |
| 17                                          | 30,666      | 34,811 | 4,15        | 13,5         |
| 18                                          | 29,157      | 30,444 | 1,29        | 4,4          |
| 19                                          | 32,904      | 36,961 | 4,06        | 12,3         |
| 20                                          | 33,619      | 34,538 | 0,92        | 2,7          |
| Media                                       | 31,2        | 33,4   | 2,1         | 6,7          |
| Std. Dev                                    | 3,3         | 4,6    | 2,7         |              |
| N. Volontari                                | 20          | 20     | 20          |              |
| t-test                                      | 1,652370547 |        |             |              |
| Gradi di Libertà                            | 38          |        |             |              |
| p                                           | 0,106699487 |        |             |              |

| Forehead wrinkles Score D0 - D28<br>2,5% w/w AAO formulation |             |        |             |              |
|--------------------------------------------------------------|-------------|--------|-------------|--------------|
| # Volontario                                                 | D0          | D28    | Δ(D28 - D0) | Δ(D28 - D0)% |
| 1                                                            | 27,228      | 24,440 | -2,79       | -10,24       |
| 2                                                            | 29,144      | 25,718 | -3,43       | -11,76       |
| 3                                                            | 25,483      | 24,420 | -1,06       | -4,17        |
| 4                                                            | 28,381      | 26,300 | -2,08       | -7,33        |
| 5                                                            | 29,339      | 25,257 | -4,08       | -13,91       |
| 6                                                            | 28,333      | 26,259 | -2,07       | -7,32        |
| 7                                                            | 25,883      | 26,983 | 1,10        | 4,25         |
| 8                                                            | 26,869      | 24,808 | -2,06       | -7,67        |
| 9                                                            | 24,541      | 25,331 | 0,79        | 3,22         |
| 10                                                           | 24,278      | 23,220 | -1,06       | -4,36        |
| 11                                                           | 23,535      | 22,268 | -1,27       | -5,38        |
| 12                                                           | 28,549      | 24,420 | -4,13       | -14,46       |
| 13                                                           | 25,725      | 24,922 | -0,80       | -3,12        |
| 14                                                           | 27,962      | 22,537 | -5,43       | -19,40       |
| 15                                                           | 25,727      | 23,859 | -1,87       | -7,26        |
| 16                                                           | 26,912      | 24,645 | -2,27       | -8,42        |
| 17                                                           | 28,565      | 25,846 | -2,72       | -9,52        |
| 18                                                           | 25,994      | 24,115 | -1,88       | -7,23        |
| 19                                                           | 24,345      | 22,955 | -1,39       | -5,71        |
| 20                                                           | 27,643      | 26,445 | -1,20       | -4,33        |
| Media                                                        | 26,7        | 24,7   | -2,0        | -7,2         |
| Std. Dev                                                     | 1,8         | 1,3    | 1,6         |              |
| N. Volunteers                                                | 20          | 20     | 20          |              |
| t-test                                                       | 4,027932808 |        |             |              |
| Gradi di Libertà                                             | 38          |        |             |              |
| p                                                            | 0,000259906 |        |             |              |
| ***                                                          |             |        |             |              |

|  |  |  |  |  |
|--|--|--|--|--|
|  |  |  |  |  |
|  |  |  |  |  |
|  |  |  |  |  |
|  |  |  |  |  |
|  |  |  |  |  |

| Forehead wrinkles Score D0 - D28<br>PLACEBO |             |        |             |              |
|---------------------------------------------|-------------|--------|-------------|--------------|
| # Volontario                                | D0          | D28    | Δ(D28 - D0) | Δ(D28 - D0)% |
| 1                                           | 26,300      | 33,354 | 7,05        | 26,82        |
| 2                                           | 27,611      | 30,282 | 2,67        | 9,67         |
| 3                                           | 35,359      | 38,640 | 3,28        | 9,28         |
| 4                                           | 37,454      | 39,402 | 1,95        | 5,20         |
| 5                                           | 29,340      | 31,696 | 2,36        | 8,03         |
| 6                                           | 26,747      | 30,814 | 4,07        | 15,21        |
| 7                                           | 34,977      | 37,930 | 2,95        | 8,44         |
| 8                                           | 36,223      | 33,049 | -3,17       | -8,76        |
| 9                                           | 31,120      | 30,002 | -1,12       | -3,59        |
| 10                                          | 28,807      | 29,988 | 1,18        | 4,10         |
| 11                                          | 30,992      | 37,173 | 6,18        | 19,94        |
| 12                                          | 30,577      | 28,942 | -1,64       | -5,35        |
| 13                                          | 27,614      | 28,776 | 1,16        | 4,21         |
| 14                                          | 34,826      | 37,017 | 2,19        | 6,29         |
| 15                                          | 28,157      | 35,000 | 6,84        | 24,30        |
| 16                                          | 32,494      | 30,068 | -2,43       | -7,47        |
| 17                                          | 30,666      | 36,306 | 5,64        | 18,39        |
| 18                                          | 29,157      | 33,867 | 4,71        | 16,15        |
| 19                                          | 32,904      | 38,571 | 5,67        | 17,22        |
| 20                                          | 33,619      | 34,638 | 1,02        | 3,03         |
| Media                                       | 31,2        | 33,8   | 2,5         | 8,6          |
| Std. Dev                                    | 3,3         | 3,6    | 3,0         |              |
| N. Volunteers                               | 20          | 20     | 20          |              |
| t-test                                      | 2,309887886 |        |             |              |
| Gradi di Libertà                            | 38          |        |             |              |
| p                                           | 0,026421785 |        |             |              |

|  |   |  |  |  |
|--|---|--|--|--|
|  | * |  |  |  |
|  |   |  |  |  |
|  |   |  |  |  |
|  |   |  |  |  |
|  |   |  |  |  |
|  |   |  |  |  |

[illegible]

|  |  |  |  |  |  |
|--|--|--|--|--|--|
|  |  |  |  |  |  |
|--|--|--|--|--|--|

[illegible]

| Skin pliability/firmness (R0) D0 - D14<br>2,5% w/w AAO formulation |             |       |             |             |
|--------------------------------------------------------------------|-------------|-------|-------------|-------------|
| # Volontario                                                       | D0          | D14   | Δ(D14 - D0) | Δ(D14 -D0)% |
| 1                                                                  | 0,296       | 0,291 | -0,01       | -1,7        |
| 2                                                                  | 0,365       | 0,331 | -0,03       | -9,3        |
| 3                                                                  | 0,365       | 0,297 | -0,07       | -18,6       |
| 4                                                                  | 0,334       | 0,313 | -0,02       | -6,3        |
| 5                                                                  | 0,387       | 0,343 | -0,04       | -11,4       |
| 6                                                                  | 0,333       | 0,318 | -0,01       | -4,4        |
| 7                                                                  | 0,354       | 0,336 | -0,02       | -5,1        |
| 8                                                                  | 0,317       | 0,309 | -0,01       | -2,5        |
| 9                                                                  | 0,327       | 0,312 | -0,02       | -4,6        |
| 10                                                                 | 0,376       | 0,329 | -0,05       | -12,5       |
| 11                                                                 | 0,373       | 0,327 | -0,05       | -12,3       |
| 12                                                                 | 0,361       | 0,341 | -0,02       | -5,5        |
| 13                                                                 | 0,347       | 0,328 | -0,02       | -5,4        |
| 14                                                                 | 0,381       | 0,318 | -0,06       | -16,5       |
| 15                                                                 | 0,344       | 0,327 | -0,02       | -4,9        |
| 16                                                                 | 0,368       | 0,329 | -0,04       | -10,6       |
| 17                                                                 | 0,370       | 0,331 | -0,04       | -10,5       |
| 18                                                                 | 0,358       | 0,315 | -0,04       | -12,0       |
| 19                                                                 | 0,392       | 0,332 | -0,06       | -15,3       |
| 20                                                                 | 0,347       | 0,308 | -0,04       | -11,2       |
| Media                                                              | 0,355       | 0,322 | 0,0         | -9,0        |
| Std. Dev                                                           | 0,024       | 0,014 |             |             |
| N. Volontari                                                       | 20          | 20    |             |             |
| t-test                                                             | 5,248439051 |       |             |             |
| Gradi di Libertà                                                   | 38          |       |             |             |
| p                                                                  | 6,0956E-06  |       |             |             |
| ***                                                                |             |       |             |             |

|  |  |  |  |  |
|--|--|--|--|--|
|  |  |  |  |  |
|  |  |  |  |  |
|  |  |  |  |  |
|  |  |  |  |  |
|  |  |  |  |  |
|  |  |  |  |  |
|  |  |  |  |  |
|  |  |  |  |  |
|  |  |  |  |  |
|  |  |  |  |  |

| Skin pliability/firmness (R0) D0 - D14<br>PLA CEBO |             |       |             |             |
|----------------------------------------------------|-------------|-------|-------------|-------------|
| # Volontario                                       | D0          | D14   | Δ(D14 - D0) | Δ(D14 -D0)% |
| 1                                                  | 0,287       | 0,323 | 0,04        | 12,5        |
| 2                                                  | 0,332       | 0,343 | 0,01        | 3,3         |
| 3                                                  | 0,359       | 0,313 | -0,05       | -12,8       |
| 4                                                  | 0,371       | 0,384 | 0,01        | 3,5         |
| 5                                                  | 0,250       | 0,258 | 0,01        | 3,2         |
| 6                                                  | 0,341       | 0,352 | 0,01        | 3,2         |
| 7                                                  | 0,368       | 0,391 | 0,02        | 6,3         |
| 8                                                  | 0,385       | 0,370 | -0,02       | -3,9        |
| 9                                                  | 0,301       | 0,398 | 0,10        | 32,2        |
| 10                                                 | 0,277       | 0,316 | 0,04        | 14,1        |
| 11                                                 | 0,285       | 0,335 | 0,05        | 17,5        |
| 12                                                 | 0,348       | 0,341 | -0,01       | -2,0        |
| 13                                                 | 0,303       | 0,379 | 0,08        | 25,1        |
| 14                                                 | 0,281       | 0,293 | 0,01        | 4,3         |
| 15                                                 | 0,235       | 0,306 | 0,07        | 30,2        |
| 16                                                 | 0,349       | 0,341 | -0,01       | -2,3        |
| 17                                                 | 0,317       | 0,327 | 0,01        | 3,2         |
| 18                                                 | 0,227       | 0,234 | 0,01        | 3,1         |
| 19                                                 | 0,301       | 0,356 | 0,06        | 18,3        |
| 20                                                 | 0,248       | 0,251 | 0,00        | 1,2         |
| Media                                              | 0,308       | 0,331 | 0,0         | 8,0         |
| Std. Dev                                           | 0,047       | 0,046 |             |             |
| N. Volontari                                       | 20          | 20    |             |             |
| t-test                                             | 1,511579593 |       |             |             |
| Gradi di Libertà                                   | 38          |       |             |             |
| p                                                  | 0,138913204 |       |             |             |

| Skin pliability/firmness (R0) D0 - D28<br>2,5% w/w AAO formulation |             |       |             |             |
|--------------------------------------------------------------------|-------------|-------|-------------|-------------|
| # Volontario                                                       | D0          | D28   | Δ(D28 - D0) | Δ(D28 -T0)% |
| 1                                                                  | 0,296       | 0,296 | 0,00        | 0,0         |
| 2                                                                  | 0,365       | 0,303 | -0,06       | -17,0       |
| 3                                                                  | 0,365       | 0,294 | -0,07       | -19,5       |
| 4                                                                  | 0,334       | 0,293 | -0,04       | -12,3       |
| 5                                                                  | 0,387       | 0,303 | -0,08       | -21,7       |
| 6                                                                  | 0,333       | 0,293 | -0,04       | -12,0       |
| 7                                                                  | 0,354       | 0,346 | -0,01       | -2,3        |
| 8                                                                  | 0,317       | 0,280 | -0,04       | -11,7       |
| 9                                                                  | 0,327       | 0,295 | -0,03       | -9,8        |
| 10                                                                 | 0,376       | 0,310 | -0,07       | -17,6       |
| 11                                                                 | 0,373       | 0,370 | 0,00        | -0,8        |
| 12                                                                 | 0,361       | 0,298 | -0,06       | -17,5       |
| 13                                                                 | 0,347       | 0,381 | 0,03        | 9,8         |
| 14                                                                 | 0,381       | 0,298 | -0,08       | -21,8       |
| 15                                                                 | 0,344       | 0,297 | -0,05       | -13,7       |
| 16                                                                 | 0,368       | 0,291 | -0,08       | -20,9       |
| 17                                                                 | 0,370       | 0,332 | -0,04       | -10,3       |
| 18                                                                 | 0,358       | 0,280 | -0,08       | -21,8       |
| 19                                                                 | 0,392       | 0,302 | -0,09       | -23,0       |
| 20                                                                 | 0,347       | 0,292 | -0,06       | -15,9       |
| Media                                                              | 0,355       | 0,308 | -0,047      | -13,0       |
| Std. Dev                                                           | 0,024       | 0,028 |             |             |
| N. Volontari                                                       | 20          | 20    | 20          |             |
| t-test                                                             | 5,684794358 |       |             |             |
| Gradi di Libertà                                                   | 38          |       |             |             |
| p                                                                  | 1,54092E-06 |       |             |             |
| ***                                                                |             |       |             |             |

|  |  |  |  |  |
|--|--|--|--|--|
|  |  |  |  |  |
|  |  |  |  |  |
|  |  |  |  |  |
|  |  |  |  |  |
|  |  |  |  |  |
|  |  |  |  |  |
|  |  |  |  |  |
|  |  |  |  |  |
|  |  |  |  |  |
|  |  |  |  |  |

| Skin pliability/firmness (R0) D0 - D28<br>PLA CEBO |             |       |             |             |
|----------------------------------------------------|-------------|-------|-------------|-------------|
| # Volontario                                       | D0          | D28   | Δ(D28 - D0) | Δ(D28 -T0)% |
| 1                                                  | 0,287       | 0,334 | 0,05        | 16,4        |
| 2                                                  | 0,332       | 0,354 | 0,02        | 6,6         |
| 3                                                  | 0,359       | 0,365 | 0,01        | 1,7         |
| 4                                                  | 0,371       | 0,373 | 0,00        | 0,5         |
| 5                                                  | 0,250       | 0,295 | 0,05        | 18,0        |
| 6                                                  | 0,341       | 0,374 | 0,03        | 9,7         |
| 7                                                  | 0,368       | 0,399 | 0,03        | 8,4         |
| 8                                                  | 0,385       | 0,372 | -0,01       | -3,4        |
| 9                                                  | 0,301       | 0,368 | 0,07        | 22,3        |
| 10                                                 | 0,277       | 0,324 | 0,05        | 16,8        |
| 11                                                 | 0,285       | 0,315 | 0,03        | 10,5        |
| 12                                                 | 0,348       | 0,354 | 0,01        | 1,7         |
| 13                                                 | 0,303       | 0,337 | 0,03        | 11,2        |
| 14                                                 | 0,281       | 0,323 | 0,04        | 14,9        |
| 15                                                 | 0,235       | 0,336 | 0,10        | 43,0        |
| 16                                                 | 0,349       | 0,368 | 0,02        | 5,4         |
| 17                                                 | 0,317       | 0,365 | 0,05        | 15,1        |
| 18                                                 | 0,227       | 0,258 | 0,03        | 13,7        |
| 19                                                 | 0,301       | 0,365 | 0,06        | 21,3        |
| 20                                                 | 0,248       | 0,264 | 0,02        | 6,5         |
| Media                                              | 0,308       | 0,342 | 0,0         | 12,0        |
| Std. Dev                                           | 0,047       | 0,037 |             |             |
| N. Volontari                                       | 20          | 20    | 20          |             |
| t-test                                             | 2,514463308 |       |             |             |
| Gradi di Libertà                                   | 38          |       |             |             |
| p                                                  | 0,016274168 |       |             |             |

| Gross Elasticity (R2) D0 - D14<br>2,5% w/w AAO formulation |             |       |             |             |
|------------------------------------------------------------|-------------|-------|-------------|-------------|
| # Volontario                                               | D0          | D14   | Δ(D14 - D0) | Δ(D14 -D0)% |
| 1                                                          | 0,487       | 0,752 | 0,27        | 54,4        |
| 2                                                          | 0,497       | 0,716 | 0,22        | 44,1        |
| 3                                                          | 0,596       | 0,654 | 0,06        | 9,7         |
| 4                                                          | 0,604       | 0,612 | 0,01        | 1,3         |
| 5                                                          | 0,598       | 0,705 | 0,11        | 17,9        |
| 6                                                          | 0,587       | 0,606 | 0,02        | 3,2         |
| 7                                                          | 0,694       | 0,698 | 0,00        | 0,6         |
| 8                                                          | 0,506       | 0,699 | 0,19        | 38,1        |
| 9                                                          | 0,696       | 0,742 | 0,05        | 6,6         |
| 10                                                         | 0,676       | 0,741 | 0,06        | 9,6         |
| 11                                                         | 0,607       | 0,689 | 0,08        | 13,5        |
| 12                                                         | 0,519       | 0,629 | 0,11        | 21,2        |
| 13                                                         | 0,695       | 0,598 | -0,10       | -14,0       |
| 14                                                         | 0,694       | 0,615 | -0,08       | -11,4       |
| 15                                                         | 0,591       | 0,706 | 0,12        | 19,5        |
| 16                                                         | 0,597       | 0,711 | 0,11        | 19,1        |
| 17                                                         | 0,603       | 0,719 | 0,12        | 19,2        |
| 18                                                         | 0,571       | 0,703 | 0,13        | 23,1        |
| 19                                                         | 0,592       | 0,633 | 0,04        | 6,9         |
| 20                                                         | 0,623       | 0,602 | -0,02       | -3,4        |
| Media                                                      | 0,602       | 0,676 | 0,1         | 14,0        |
| Std. Dev                                                   | 0,066       | 0,052 |             |             |
| N. Volontari                                               | 20          | 20    | 20          |             |
| t-test                                                     | 3,98870734  |       |             |             |
| Gradi di Libertà                                           | 38          |       |             |             |
| p                                                          | 0,000292009 |       |             |             |

\*\*\*

| Gross Elasticity (R2) D0 - D14<br>PLA CEBO |             |       |             |             |
|--------------------------------------------|-------------|-------|-------------|-------------|
| # Volontario                               | D0          | D14   | Δ(D14 - D0) | Δ(D14 -D0)% |
| 1                                          | 0,512       | 0,528 | 0,02        | 3,1         |
| 2                                          | 0,538       | 0,557 | 0,02        | 3,5         |
| 3                                          | 0,593       | 0,591 | 0,00        | -0,3        |
| 4                                          | 0,425       | 0,504 | 0,08        | 18,6        |
| 5                                          | 0,475       | 0,496 | 0,02        | 4,4         |
| 6                                          | 0,512       | 0,529 | 0,02        | 3,3         |
| 7                                          | 0,498       | 0,425 | -0,07       | -14,7       |
| 8                                          | 0,482       | 0,506 | 0,02        | 4,9         |
| 9                                          | 0,512       | 0,508 | 0,00        | -0,8        |
| 10                                         | 0,498       | 0,511 | 0,01        | 2,6         |
| 11                                         | 0,434       | 0,451 | 0,02        | 3,9         |
| 12                                         | 0,467       | 0,464 | 0,00        | -0,6        |
| 13                                         | 0,569       | 0,562 | -0,01       | -1,2        |
| 14                                         | 0,543       | 0,546 | 0,00        | 0,6         |
| 15                                         | 0,547       | 0,551 | 0,00        | 0,7         |
| 16                                         | 0,502       | 0,514 | 0,01        | 2,4         |
| 17                                         | 0,537       | 0,551 | 0,01        | 2,6         |
| 18                                         | 0,531       | 0,542 | 0,01        | 2,1         |
| 19                                         | 0,527       | 0,566 | 0,04        | 7,4         |
| 20                                         | 0,437       | 0,512 | 0,08        | 17,2        |
| Media                                      | 0,507       | 0,521 | 0,0         | 3,0         |
| Std. Dev                                   | 0,044       | 0,041 |             |             |
| N. Volontari                               | 20          | 20    | 20          |             |
| t-test                                     | 1,01977079  |       |             |             |
| Gradi di Libertà                           | 38          |       |             |             |
| p                                          | 0,314286017 |       |             |             |

| Gross Elasticity (R2) D0 - D28<br>2,5% w/w AAO formulation |             |       |             |             |
|------------------------------------------------------------|-------------|-------|-------------|-------------|
| # Volontario                                               | D0          | D28   | Δ(D28 - D0) | Δ(D28 -D0)% |
| 1                                                          | 0,487       | 0,802 | 0,32        | 64,7        |
| 2                                                          | 0,497       | 0,811 | 0,31        | 63,2        |
| 3                                                          | 0,596       | 0,804 | 0,21        | 34,9        |
| 4                                                          | 0,604       | 0,812 | 0,21        | 34,4        |
| 5                                                          | 0,598       | 0,725 | 0,13        | 21,2        |
| 6                                                          | 0,587       | 0,791 | 0,20        | 34,8        |
| 7                                                          | 0,694       | 0,698 | 0,00        | 0,6         |
| 8                                                          | 0,506       | 0,759 | 0,25        | 50,0        |
| 9                                                          | 0,696       | 0,842 | 0,15        | 21,0        |
| 10                                                         | 0,676       | 0,831 | 0,16        | 22,9        |
| 11                                                         | 0,607       | 0,609 | 0,00        | 0,3         |
| 12                                                         | 0,519       | 0,789 | 0,27        | 52,0        |
| 13                                                         | 0,695       | 0,691 | 0,00        | -0,6        |
| 14                                                         | 0,694       | 0,646 | -0,05       | -6,9        |
| 15                                                         | 0,591       | 0,818 | 0,23        | 38,4        |
| 16                                                         | 0,597       | 0,812 | 0,22        | 36,0        |
| 17                                                         | 0,603       | 0,861 | 0,26        | 42,8        |
| 18                                                         | 0,571       | 0,703 | 0,13        | 23,1        |
| 19                                                         | 0,592       | 0,683 | 0,09        | 15,4        |
| 20                                                         | 0,623       | 0,702 | 0,08        | 12,7        |
| Media                                                      | 0,602       | 0,759 | 0,2         | 28,0        |
| Std. Dev                                                   | 0,066       | 0,071 |             |             |
| N. Volontari                                               | 20          | 20    | 20          |             |
| t-test                                                     | 7,266434544 |       |             |             |
| Gradi di Libertà                                           | 38          |       |             |             |
| p                                                          | 1,0754E-08  |       |             |             |

\*\*\*

| Gross Elasticity (R2) D0 - D28<br>PLA CEBO |             |       |             |             |
|--------------------------------------------|-------------|-------|-------------|-------------|
| # Volontario                               | D0          | D28   | Δ(D28 - D0) | Δ(D28 -D0)% |
| 1                                          | 0,512       | 0,521 | 0,01        | 1,8         |
| 2                                          | 0,538       | 0,551 | 0,01        | 2,4         |
| 3                                          | 0,593       | 0,574 | -0,02       | -3,2        |
| 4                                          | 0,425       | 0,512 | 0,09        | 20,5        |
| 5                                          | 0,475       | 0,425 | -0,05       | -10,5       |
| 6                                          | 0,512       | 0,561 | 0,05        | 9,6         |
| 7                                          | 0,498       | 0,521 | 0,02        | 4,6         |
| 8                                          | 0,482       | 0,495 | 0,01        | 2,7         |
| 9                                          | 0,512       | 0,542 | 0,03        | 5,9         |
| 10                                         | 0,498       | 0,517 | 0,02        | 3,8         |
| 11                                         | 0,434       | 0,469 | 0,04        | 8,1         |
| 12                                         | 0,467       | 0,489 | 0,02        | 4,7         |
| 13                                         | 0,569       | 0,561 | -0,01       | -1,4        |
| 14                                         | 0,543       | 0,546 | 0,00        | 0,6         |
| 15                                         | 0,547       | 0,584 | 0,04        | 6,7         |
| 16                                         | 0,502       | 0,512 | 0,01        | 2,0         |
| 17                                         | 0,537       | 0,561 | 0,02        | 4,5         |
| 18                                         | 0,531       | 0,533 | 0,00        | 0,4         |
| 19                                         | 0,527       | 0,531 | 0,00        | 0,8         |
| 20                                         | 0,437       | 0,506 | 0,07        | 15,8        |
| Media                                      | 0,507       | 0,526 | 0,0         | 4,0         |
| Std. Dev                                   | 0,044       | 0,038 |             |             |
| N. Volontari                               | 20          | 20    | 20          |             |
| t-test                                     | 1,424323801 |       |             |             |
| Gradi di Libertà                           | 38          |       |             |             |
| p                                          | 0,162513647 |       |             |             |



| #           | Panelist ID | Sex | Erythema<br>48h | Oedema<br>48 | Erythema<br>72h | Oedema<br>72h |       |
|-------------|-------------|-----|-----------------|--------------|-----------------|---------------|-------|
| 1           | FF85        | F   | 0               | 0            | 0               | 0             |       |
| 2           | LR95        | F   | 0               | 0            | 0               | 0             |       |
| 3           | FDL76       | F   | 0               | 1            | 0               | 0             |       |
| 4           | RDL62       | F   | 2               | 0            | 0               | 0             |       |
| 5           | EV79        | F   | 0               | 0            | 0               | 0             |       |
| 6           | FM68        | F   | 0               | 0            | 0               | 0             |       |
| 7           | AM68        | F   | 1               | 0            | 0               | 0             |       |
| 8           | BA74        | F   | 1               | 1            | 0               | 0             |       |
| 9           | IN77        | F   | 1               | 2            | 0               | 1             |       |
| 10          | VN76        | F   | 0               | 0            | 0               | 0             |       |
| 11          | SN78        | F   | 0               | 0            | 0               | 0             |       |
| 12          | FS77        | F   | 1               | 1            | 0               | 0             |       |
| 13          | IL66        | F   | 0               | 0            | 0               | 0             |       |
| 14          | AD66        | F   | 0               | 0            | 0               | 0             |       |
| 15          | PR71        | F   | 0               | 0            | 0               | 0             |       |
| 16          | AG66        | F   | 0               | 1            | 0               | 0             |       |
| 17          | LR88        | F   | 0               | 0            | 0               | 0             |       |
| 18          | MDC76       | F   | 0               | 0            | 0               | 0             |       |
| 19          | LB77        | F   | 0               | 0            | 0               | 0             |       |
| 20          | EF66        | F   | 0               | 0            | 0               | 0             |       |
| MEAN VALUES |             |     | 0,300           | 0,300        | 0,000           | 0,050         | 0,050 |
| SD          |             |     | 0,571           | 0,571        | 0,000           | 0,224         |       |
| MEAN + SD   |             |     | 0,871           | 0,871        | 0,000           | 0,274         | 0,274 |
|             |             |     | E-PI48          | O-PI48       | E-PI72          | O-PI72        | PIM   |

## PATIENT CONSENT FORM

Name..... Surname .....

Study Title: ..... Type of study.....

- a) **PREDICTABLE RISKS LINKED TO EXECUTION (AT THE TIME OF PROPOSAL) AND POSSIBLE COMPLICATIONS:** redness (erythema) may appear in the treated area during the study, which usually regresses in 24-48 hours; blisters and/or scabs may appear and disappear in 10-20 days; soothing, healing and disinfectant dressings are prescribed for both situations. In some cases, localized and/or extensive sensitivity of treated areas may occur. In case of severe irritation, hives, swelling of the eyes and mouth, blisters, rinse, discontinue use and seek immediate medical attention.
- b) **ANY PRECIFICATIONS DUE TO PARTICULAR CLINICAL CONDITIONS:** in the case of subjects with ongoing infectious or widespread inflammatory processes, subjects undergoing therapy with photosensitizing drugs, and subjects with a positive history of hypertrophic or keloid scars, allergic subjects, subjects with rosacea, psoriasis, atopic dermatitis, or other dermatological conditions, subjects undergoing treatment with AHAs and BHAs, retinoids or derivatives, whether topical or systemic, cosmetic treatment is not recommended.

I, the undersigned .....document of identification ..... no.  
.....

On ...../...../..... now ..... during the interview with Dr./Prof. .... I was informed about the proposal to be subjected to:

**COSMETIC EFFICACY STUDY REF. FBA CEE 21N01**

I have been given the explanations listed above under a) b) and having understood what was explained, I freely and knowingly decide to:

☐ Consent to be subjected to the above-described service, taking into account also the foreseeable impairing consequences, temporary or permanent, resulting from the performance of the proposed service, as described in the Disclosure.

I acknowledge that I have received and read a copy of the Specific Written Notice.

I understand that it is my right to request further explanation at any time.

I am also aware that I may revoke my decisions expressed herein at any time.

- ✓ I commit myself, to take part in the product efficacy study for the duration of the product test product .....
- ✓ I also agree to comply with the protocol drafted by the investigators, specified in point a of the RD Cosmetics laboratory of the Department of Pharmacy - University of Naples Federico II, located in Via D. Montesano, 49 - 80131 Naples.
- ✓ I also commit myself not to use any other type of product on the skin, not previously agreed and accepted by the investigators, throughout the study period.
- ✓ I undertake to take part in the periodic controls established with the laboratory technical staff.
- ✓ Furthermore, having read the composition of the product (Id Form IOP04\_M Sample Acceptance Form), I declare that I do not have any type of allergy to the components in it.
- ✓ I also declare that I have no allergies towards ingredients commonly used in cosmetic products.
- ✓ I am aware that all product safety data have been evaluated in accordance with Annex 1 of EC Regulation 1223/2009.

I, the undersigned, further declare that I am aware in giving this consent and assume full responsibility for it.

Signature of Volunteer .....

Signature of Witness ..... (Person present at the interview)

Stamp and Signature of Laboratory Manager .....
